# Supplementary material for: A high-volumetric-capacity and high-areal-capacity ZnCo2O4 anode for Li-ion batteries enabled by a robust biopolymer binder
Source: Royal Society of Chemistry journal article supplement (doi:10.1039/c8ta07840h), 2018-01-01
Supplement: c8ta07840h1.pdf [file c8ta07840h1.pdf]

## Supporting Information

### A high-volumetric-capacity and high-areal-capacity $\text{ZnCo}_2\text{O}_4$ anode for Li-ion battery enabled by a robust biopolymer binder

*Jie Liu,<sup>a,b,1</sup> Yuxue Xuan,<sup>c,1</sup> Dilini G. D. Galpaya,<sup>d</sup> Yuanxiang Gu,<sup>c</sup> Zhan Lin,<sup>e</sup> Shanqing  
Zhang,<sup>f</sup> Cheng Yan,<sup>d</sup> Shouhua Feng<sup>a,g</sup> and Lei Wang<sup>a,g,\*</sup>*

<sup>a</sup> Taishan Scholar Advantage and Characteristic Discipline Team of Eco-chemical Process and Technology, State Key Laboratory Base of Eco-chemical Engineering, Qingdao University of Science and Technology, Qingdao 266042, China

<sup>b</sup> College of Chemical Engineering, Qingdao University of Science and Technology, Qingdao 266042, China

<sup>c</sup> College of Environment and safety Engineering, Qingdao University of Science and Technology, Qingdao 266042, China

<sup>d</sup> School of Chemistry, Queensland University of Technology, QLD 4001, Australia

<sup>e</sup> Key Laboratory of Biomass Chemical Engineering of Ministry of Education, College of Chemical and Biological Engineering, Zhejiang University, Hangzhou 310027, China

<sup>f</sup> Centre for Clean Environment and Energy, Environmental Futures Research Institute and Griffith School of Environment, Gold Coast Campus, Griffith University, QLD 4222, Australia

<sup>g</sup> College of Chemistry and Molecular Engineering, Qingdao University of Science and Technology, Qingdao 266042, China

\* Corresponding author. E-mail: inorchemwl@126.com

<sup>1</sup> These authors contributed equally to this work.

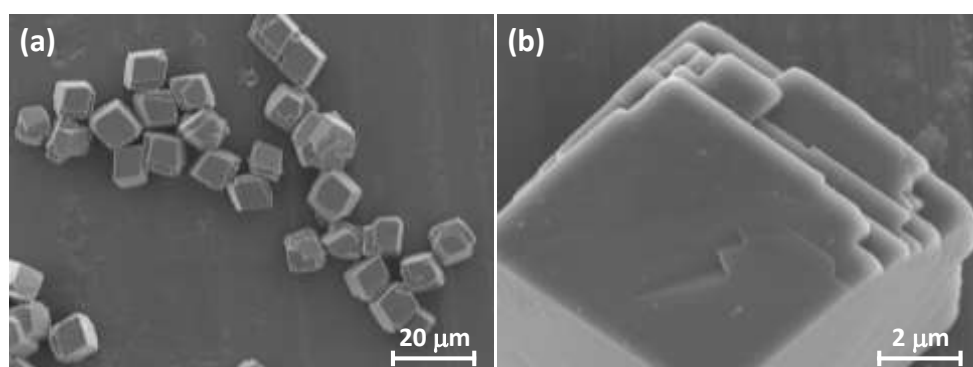

**Figure S1.** (a) low-magnification and (b) high-magnification SEM images of ZCO precursors.

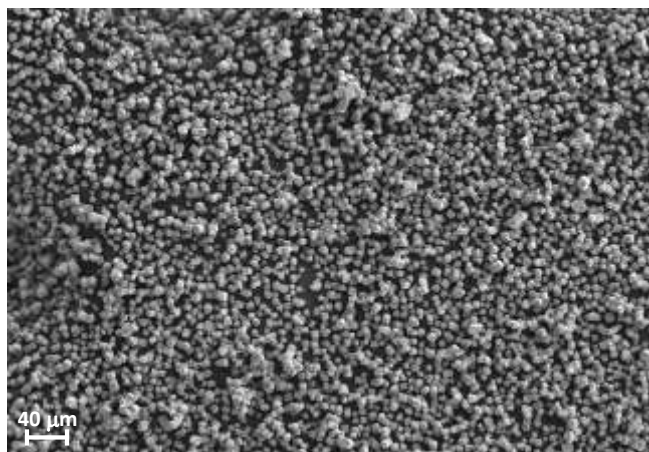

**Figure S2.** Large-area SEM image of ZCO.

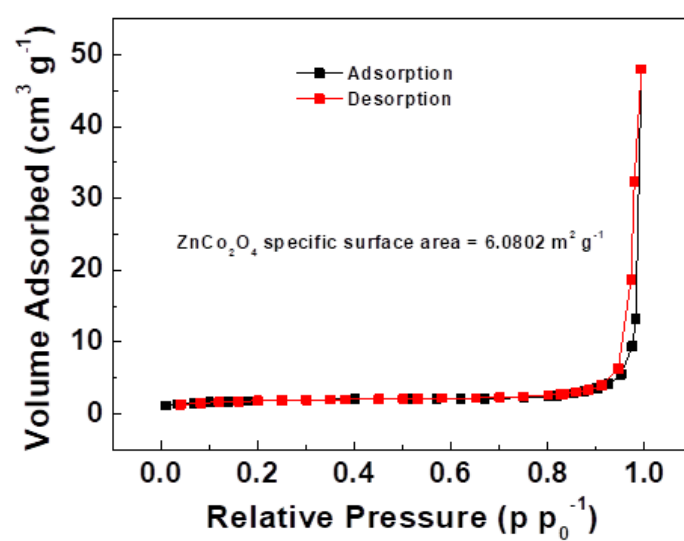

**Figure S3.** Nitrogen adsorption-desorption isotherms of ZCO, showing enhanced specific surface area of ZCO compared with ZCO precursors ( $0.0988 \text{ m}^2 \text{g}^{-1}$ ).

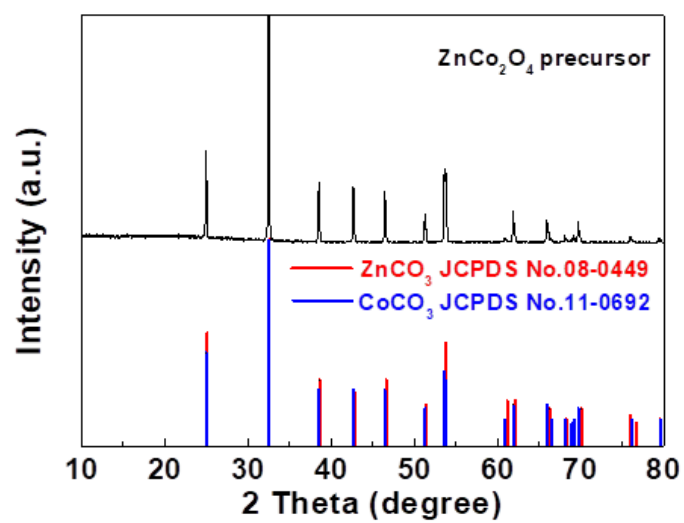

**Figure S4.** XRD pattern of ZCO precursors.

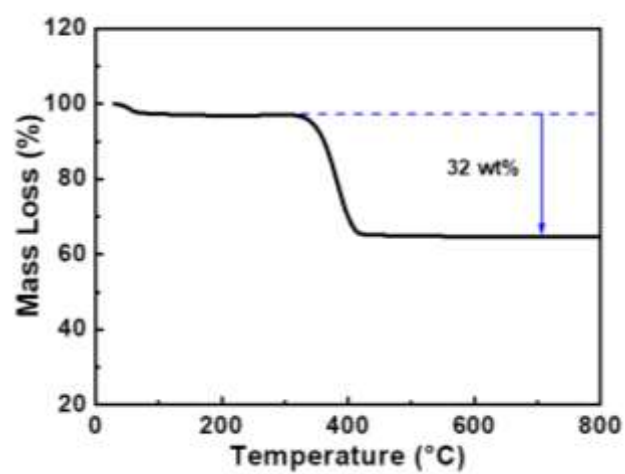

**Figure S5.** TGA curve of ZCO precursors in air.

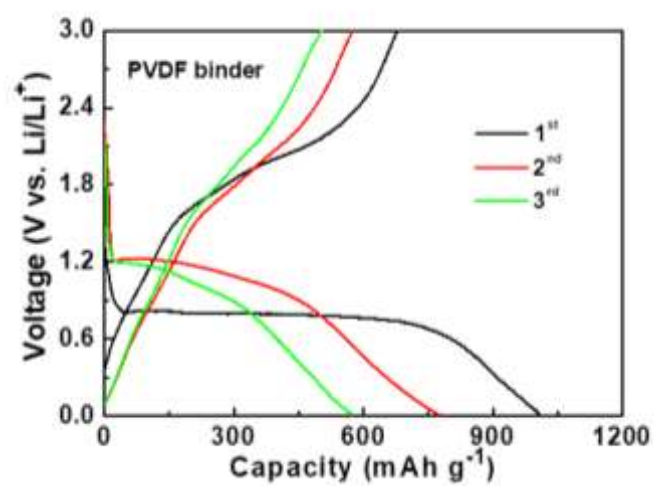

**Figure S6.** Charge-discharge curves of ZCO anode with PVDF binder.

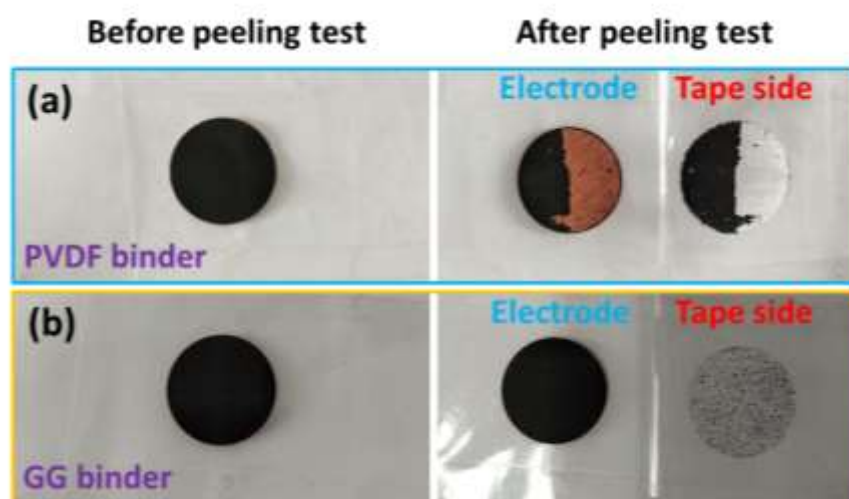

**Figure S7.** Peeling tests of ZCO electrodes with (a) PVDF binder and (b) GG binder, showing high adhesive force of GG binder on copper current collector.



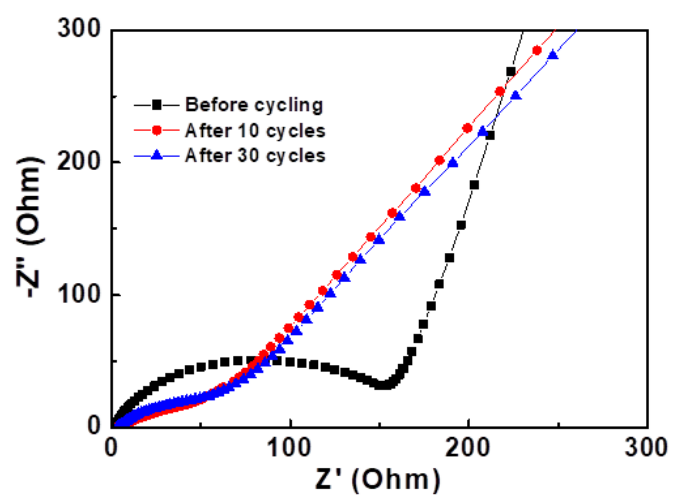

**Figure S8.** Nyquist plots of ZCO anode with GG binder, showing the stable electrode structure during cycling.

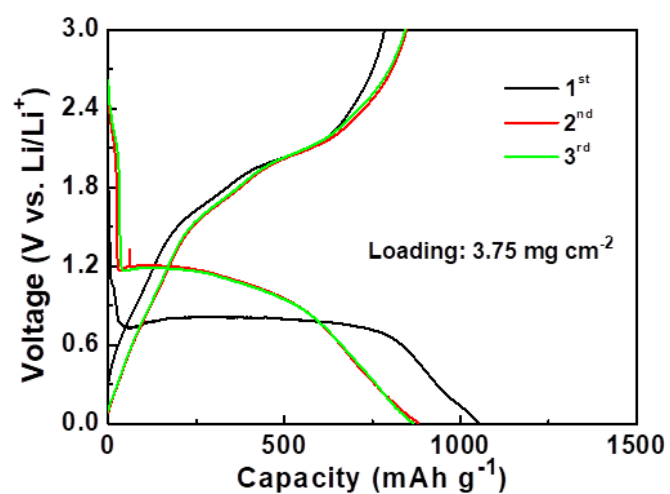

**Figure S9.** Charge-discharge curves of ZCO anode with GG binder with a high loading of  $3.75 \text{ mg cm}^{-2}$ .

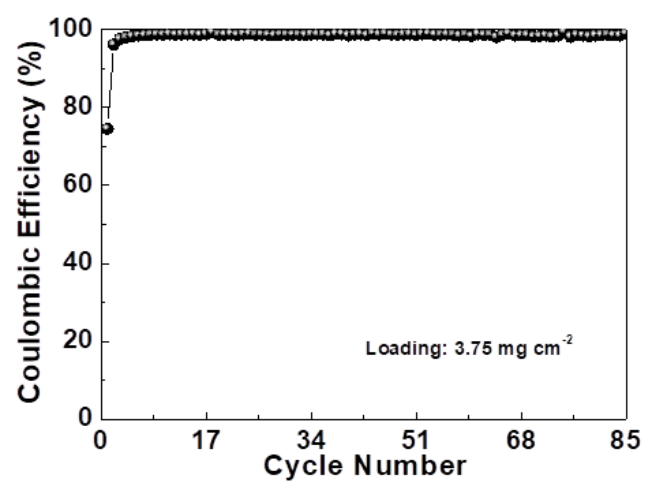

**Figure S10.** Coulombic efficiency of ZCO anode with GG binder with a high loading of 3.75 mg cm<sup>-2</sup>.

**Table S1.** Comparison of the loading of ZCO-based active materials in Li-ion batteries, showing that an ultrahigh-loading ZCO anode has been obtained in this work.

| Ref.             | Active material                                                                                 | Mass loading<br>(mg cm <sup>-2</sup> ) |
|------------------|-------------------------------------------------------------------------------------------------|----------------------------------------|
| <b>This work</b> | <b>ZnCo<sub>2</sub>O<sub>4</sub></b>                                                            | <b>6.7</b>                             |
| 49               | ZnCo <sub>2</sub> O <sub>4</sub>                                                                | 1.0                                    |
| 14               | ZnCo <sub>2</sub> O <sub>4</sub>                                                                | 1.0                                    |
| 50               | Zn <sub>1-x</sub> Co <sub>x</sub> O/ZnCo <sub>2</sub> O <sub>4</sub>                            | 0.78, 1.69                             |
| 51               | ZnCo <sub>2</sub> O <sub>4</sub>                                                                | 1.77                                   |
| 52               | ZnCo <sub>2</sub> O <sub>4</sub>                                                                | 0.9-1.1                                |
| 10               | ZnCo <sub>2</sub> O <sub>4</sub>                                                                | 1.3-1.6                                |
| 53               | Te@ZnCo <sub>2</sub> O <sub>4</sub>                                                             | 1.0-1.2 <sup>1</sup>                   |
| 54               | ZnCo <sub>2</sub> O <sub>4</sub>                                                                | 0.3-0.6                                |
| 55               | ZnCo <sub>2</sub> O <sub>4</sub>                                                                | 0.8                                    |
| 56               | ZnCo <sub>2</sub> O <sub>4</sub>                                                                | 1.1                                    |
| 57               | ZnCo <sub>2</sub> O <sub>4</sub> @Ag                                                            | 0.56                                   |
| 58               | N-doped carbon-coated<br>ZnO/ZnCo <sub>2</sub> O <sub>4</sub> /CuCo <sub>2</sub> O <sub>4</sub> | 0.81                                   |

<sup>1</sup> The mass loading on the electrode is 1.0-1.2 mg.
